# Supplementary material for: Construction of a hollow structure in La0.9K0.1CoO3−δ nanofibers via grain size control by Sr substitution with an enhanced catalytic performance for soot removal
Source: Royal Society of Chemistry journal article supplement (doi:10.1039/c9cy01332f), 2019-01-01
Supplement: c9cy01332f1.pdf [file c9cy01332f1.pdf]

Electronic supplementary Information for  
**Construction of hollow structure in  $\text{La}_{0.9}\text{K}_{0.1}\text{CoO}_{3-\delta}$  nanofibers via  
grain size control by Sr substitution with an enhanced catalytic  
performance for soot removal**

Fan Fang, Peng Zhao, Nengjie Feng, Chong Chen, Xue Li, Geng Liu, Hui Wan\* and  
Guofeng Guan\*

*<sup>a</sup> State Key Laboratory of Materials-Oriented Chemical Engineering, College of  
Chemical Engineering, Jiangsu National Synergetic Innovation Center for Advanced  
Materials, Jiangsu Collaborative Innovation Center for Advanced Inorganic Function  
Composites, Nanjing Tech University, Nanjing 210009, P.R. China*

*\*Corresponding author:*

*Prof. Guofeng Guan, E-mail address: [guangf@njtech.edu.cn](mailto:guangf@njtech.edu.cn) Tel: +86 25 83587198*

*Prof. Hui Wan, E-mail address: [wanhui@njtech.edu.cn](mailto:wanhui@njtech.edu.cn)*

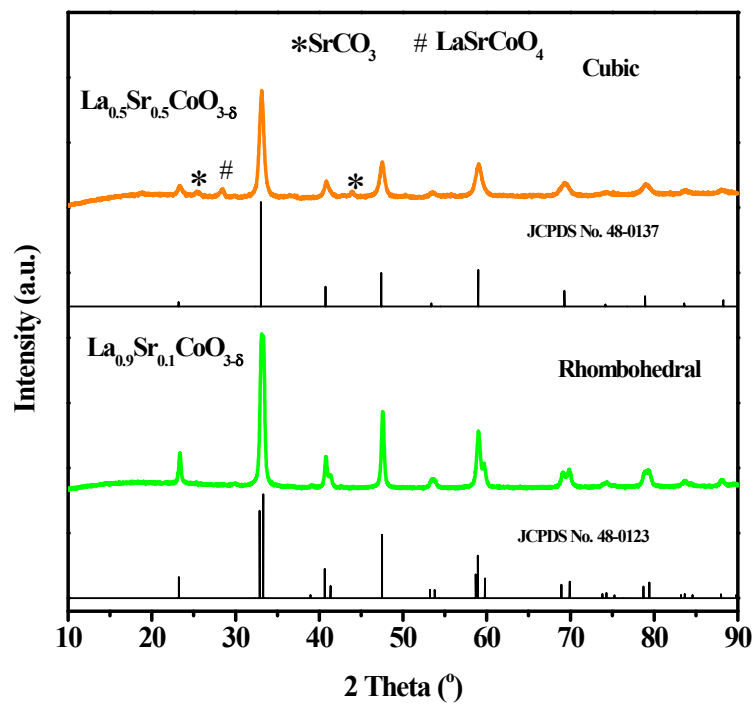

**Fig. S1.** XRD patterns of  $\text{La}_{0.9}\text{Sr}_{0.1}\text{CoO}_{3-\delta}$  and  $\text{La}_{0.5}\text{Sr}_{0.5}\text{CoO}_{3-\delta}$  catalysts.

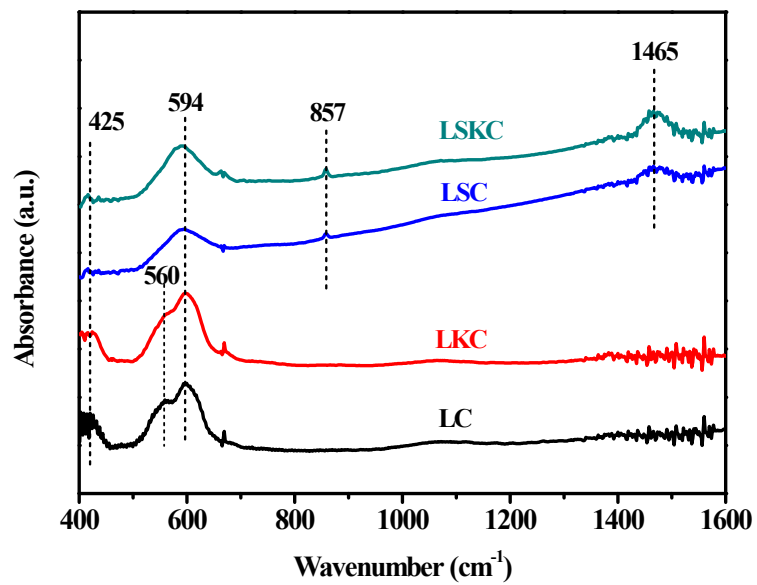

**Fig. S2.** FT-IR patterns of LC, LKC, LSC and LSKC catalysts.

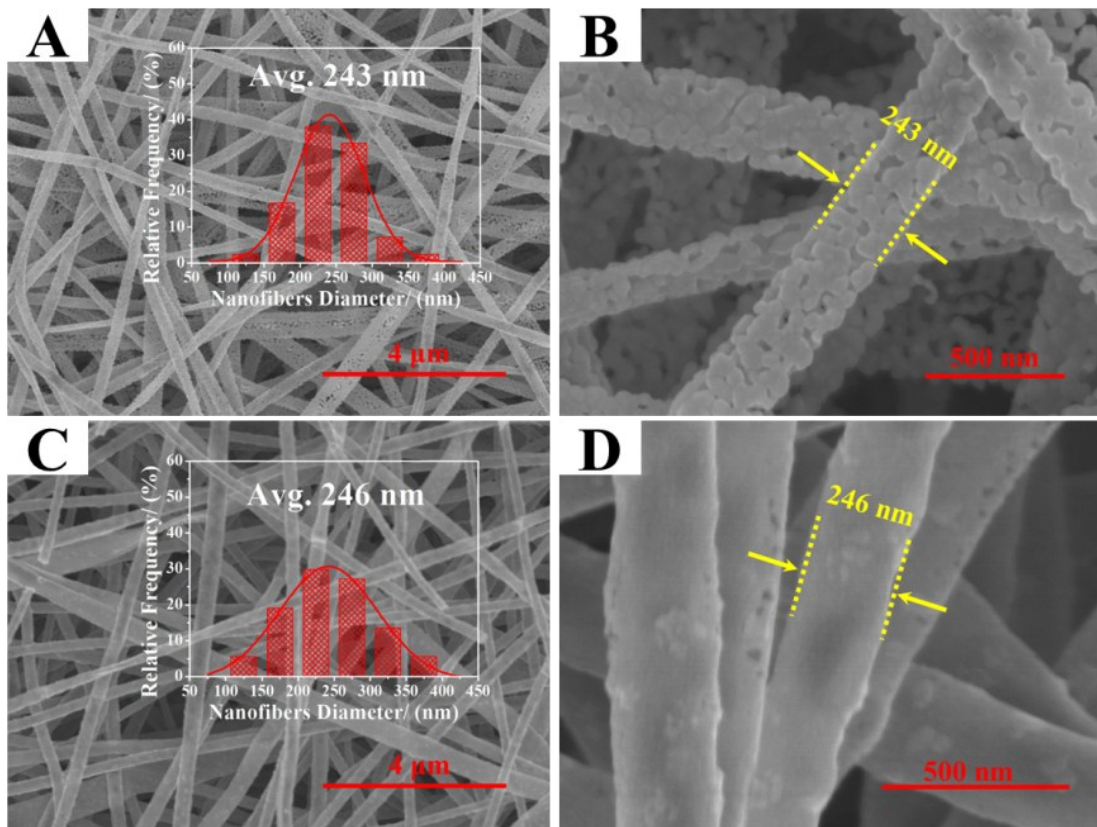

**Fig. S3.** SEM images of nanotubes: (A) and (B)  $\text{La}_{0.9}\text{Sr}_{0.1}\text{CoO}_{3-\delta}$ ; (C) and (D)  $\text{La}_{0.5}\text{Sr}_{0.5}\text{CoO}_{3-\delta}$ .

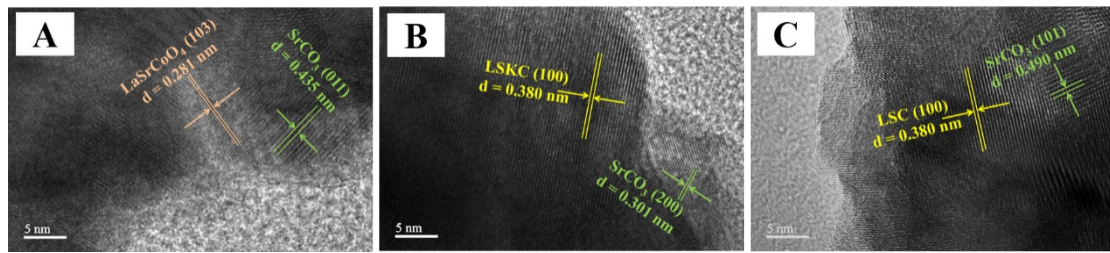

**Fig. S4.** HRTEM images of (A and B) LSKC and (C) LSC.

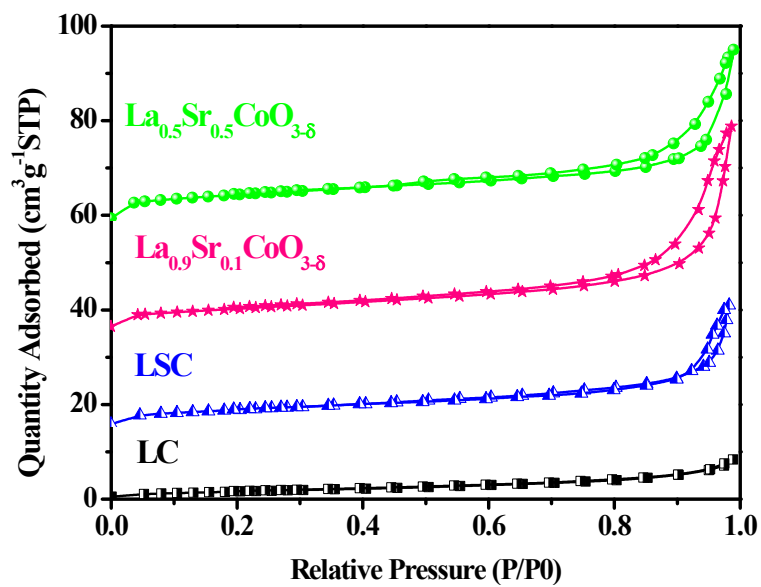

**Fig. S5.** N<sub>2</sub> adsorption-desorption isotherms of LC, LSC, La<sub>0.9</sub>Sr<sub>0.1</sub>CoO<sub>3-δ</sub> and La<sub>0.5</sub>Sr<sub>0.5</sub>CoO<sub>3-δ</sub>.

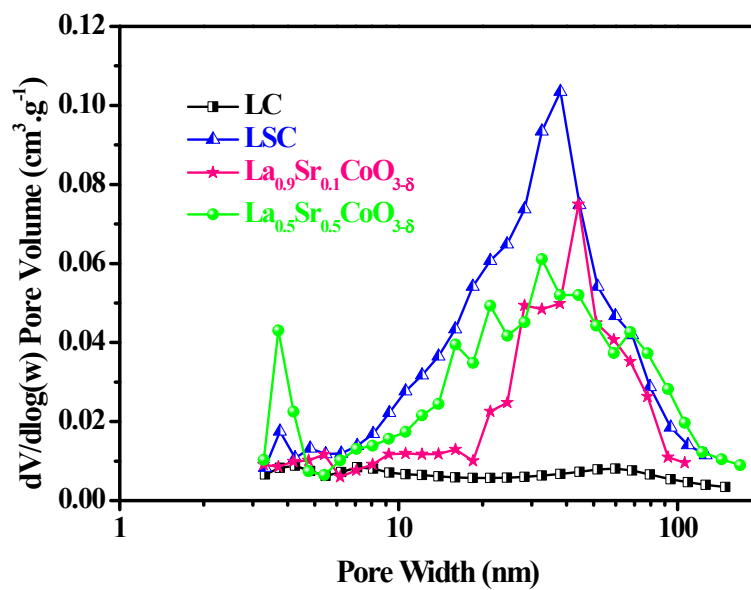

**Fig. S6.** Pore size distribution of LC, LSC, La<sub>0.9</sub>Sr<sub>0.1</sub>CoO<sub>3-δ</sub> and La<sub>0.5</sub>Sr<sub>0.5</sub>CoO<sub>3-δ</sub> obtained from BJH measurements.

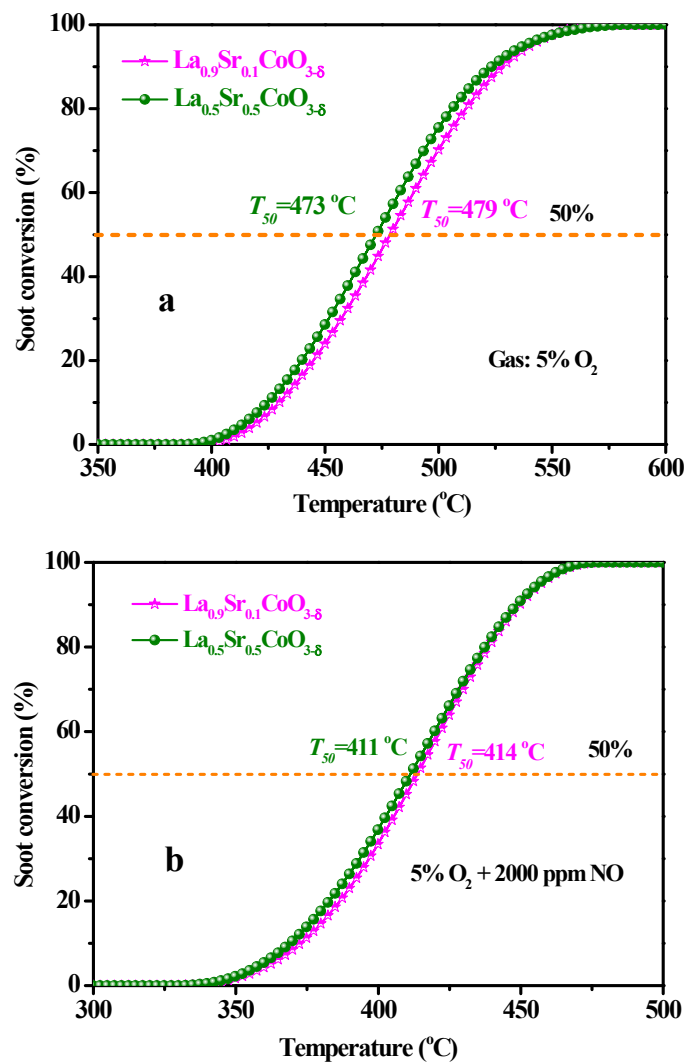

**Fig. S7.** CO<sub>2</sub> conversion profiles of soot oxidation over La<sub>0.9</sub>Sr<sub>0.1</sub>CoO<sub>3-δ</sub> and La<sub>0.5</sub>Sr<sub>0.5</sub>CoO<sub>3-δ</sub> catalysts.



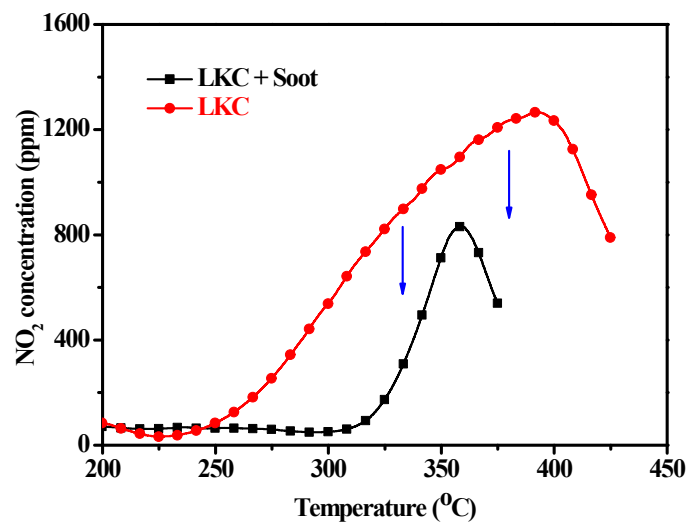

**Fig. S8.** NO<sub>2</sub> concentration as the temperature rises in NO-TPO.

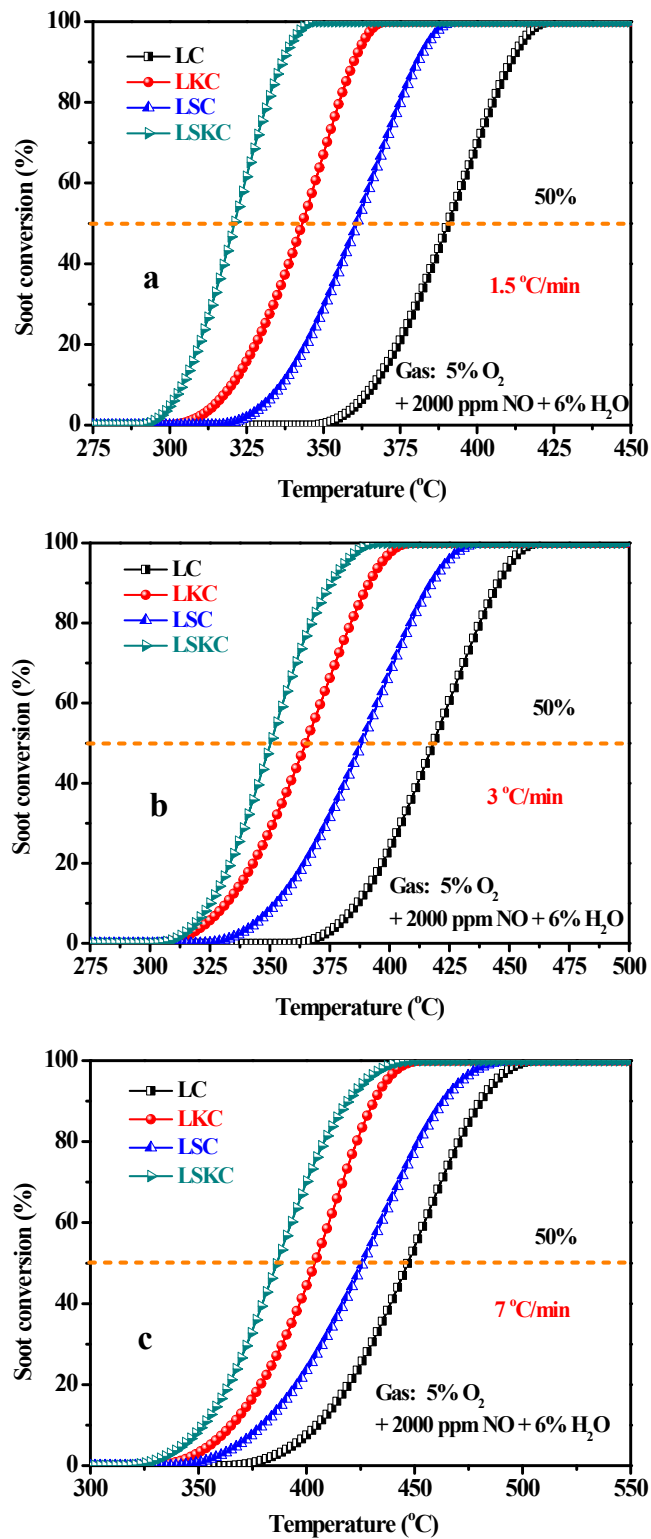

**Fig. S9.** CO<sub>2</sub> conversion profiles of soot oxidation over LC, LKC, LSC and LSKC catalysts with different heating rate.

**Table S1** Unit-cell parameters of LC, LKC, LSC, LSKC,  $\text{La}_{0.9}\text{Sr}_{0.1}\text{CoO}_{3-\delta}$  and  $\text{La}_{0.5}\text{Sr}_{0.5}\text{CoO}_{3-\delta}$ .

| Sample                                                | a (Å)  | b (Å)  | c (Å)   | $\alpha$ (deg) | $\beta$ (deg) | $\gamma$ (deg) |
|-------------------------------------------------------|--------|--------|---------|----------------|---------------|----------------|
| LC                                                    | 5.4283 | 5.4283 | 13.0316 | 90.0           | 90.0          | 120.0          |
| LKC                                                   | 5.4344 | 5.4344 | 13.0623 | 90.0           | 90.0          | 120.0          |
| LSC                                                   | 3.8171 | 3.8171 | 3.8171  | 90.0           | 90.0          | 90.0           |
| LSKC                                                  | 3.8207 | 3.8207 | 3.8207  | 90.0           | 90.0          | 90.0           |
| $\text{La}_{0.9}\text{Sr}_{0.1}\text{CoO}_{3-\delta}$ | 5.4056 | 5.4056 | 13.1182 | 90.0           | 90.0          | 120.0          |
| $\text{La}_{0.5}\text{Sr}_{0.5}\text{CoO}_{3-\delta}$ | 3.8220 | 3.8220 | 3.8220  | 90.0           | 90.0          | 90.0           |

**Table S2** The average particle size of perovskite phase, the grain growth exponent and the BET surface area of  $\text{La}_{0.9}\text{Sr}_{0.1}\text{CoO}_{3-\delta}$  and  $\text{La}_{0.5}\text{Sr}_{0.5}\text{CoO}_{3-\delta}$ .

| Catalyst                                 | $\text{La}_{0.9}\text{Sr}_{0.1}\text{CoO}_{3-\delta}$ | $\text{La}_{0.5}\text{Sr}_{0.5}\text{CoO}_{3-\delta}$ |
|------------------------------------------|-------------------------------------------------------|-------------------------------------------------------|
| D (nm)                                   | 20.1                                                  | 15.3                                                  |
| <i>m</i>                                 | 15.5                                                  | 17.0                                                  |
| BET ( $\text{m}^2 \cdot \text{g}^{-1}$ ) | 13.0                                                  | 20.1                                                  |
